# Supplementary material for: Maternal Consumption of Non-Nutritive Sweeteners during Pregnancy Is Associated with Alterations in the Colostrum Microbiota
Source: MDPI journal article supplement (doi:10.3390/nu15234928), 2023-11-26
Supplement: s1 [file s1]

# Maternal consumption of non-nutritive sweeteners during pregnancy is associated with alterations in the colostrum microbiota.

Alejandro Tapia-González<sup>1,†</sup>, Juan Manuel Vélez-Ixta<sup>2,†</sup>, Nallely Bueno-Hernández<sup>1</sup>, Alberto Piña-Escobedo<sup>2</sup>, Jesús Carlos Briones-Garduño<sup>3</sup>, Leticia de la Rosa-Ruiz<sup>4</sup>, José Aguayo-Guerrero<sup>1</sup>, Viridiana M. Mendoza-Martínez<sup>1</sup>, Lenin Snowball-del-Pilar<sup>1</sup>, Galileo Escobedo<sup>1</sup>, Guillermo Meléndez-Mier<sup>5</sup>, Lucía A. Méndez-García<sup>1</sup>, Jaime García-Mena<sup>2,\*</sup> and Marcela Esquivel-Velázquez<sup>1,\*</sup>

<sup>1</sup> Laboratorio de Proteómica e Inmunometabolismo, Hospital General de México “Dr. Eduardo Liceaga”. A.T.-G: alejandro\_tapia@ciencias.unam.mx, N.B.-H.: nallely\_bh5@yahoo.com, J.A.-G.: jose.aguayo01@iest.edu.mx, V.M.M.-M.: viridiana\_2909@hotmail.com, L.S.-P.: benitojuarezgarciam@hotmail.com, G.E.: gescobedog@msn.com, L.A.M.-G.: lucia.angelica86@gmail.com.

<sup>2</sup> Departamento de Genética y Biología Molecular, Centro de Investigación y de Estudios Avanzados del Instituto Politécnico Nacional. A.P.-E.: apinae@cinvestav.mx, J.M.V.-I.: juan.velez@cinvestav.mx.

<sup>3</sup> Servicio de Ginecología, Hospital General de México “Dr. Eduardo Liceaga”. drcarlosbriones@yahoo.com.mx

<sup>4</sup> Banco de Leche Humana y Lactancia, Hospital General de México “Dr. Eduardo Liceaga”. letyrose@gmail.com

<sup>5</sup> Facultad de Salud Pública y Nutrición, Universidad Autónoma de Monterrey. melendez651@gmail.com

† These authors contributed equally to this work.

\* Correspondence: M.E.-V.: esquivel.marcela@gmail.com; J.G.-M.: jgmena@cinvestav.mx; Tel.: M.E.-V.: +52 55 2789 2000 Ext. 5652 or 5658; J.G.-M.: +52 55 5747 3800 Ext. 5327.

## Supplementary tables

Table S1. Analysis of qualitative and quantitative variables in relation to the Weighted and Unweighted clusters.

|            |     | Weighted clusters |          |         |            |                    | Unweighted clusters |          |            |                    |
|------------|-----|-------------------|----------|---------|------------|--------------------|---------------------|----------|------------|--------------------|
|            |     | 1                 | 2        | 3       | $\chi^2/t$ | $p$                | 1                   | 2        | $\chi^2/F$ | $p$                |
| CDMX       | YES | 29(70.7)          | 13(81.3) | 6(60)   | 1.411      | 0.494 <sup>a</sup> | 20(74.1)            | 28(70)   | .132       | 0.717 <sup>a</sup> |
|            | NO  | 12(29.3)          | 3(18.8)  | 4(40)   |            |                    | 7(25.9)             | 12(30)   |            |                    |
| ZMVM       | YES | 40(97.6)          | 15(93.8) | 9(90)   | 1.229      | 0.541 <sup>a</sup> | 27(100)             | 37(92.5) | 2.120      | 0.145 <sup>a</sup> |
|            | NO  | 1(2.4)            | 1(6.3)   | 1(10)   |            |                    | 0(0)                | 3(7.5)   |            |                    |
| Father DBT | YES | 4(10.3)           | 2(11.1)  | 6(54.5) | 12.300     | 0.002 <sup>a</sup> | 4(14.3)             | 8(20)    | .370       | 0.543 <sup>a</sup> |
|            | NO  | 35(89.7)          | 16(88.9) | 5(45.5) |            |                    | 24(85.7)            | 32(80)   |            |                    |
| Father HTN | YES | 2(5.1)            | 1(5.6)   | 2(18.2) | 2.262      | 0.323 <sup>a</sup> | 1(3.6)              | 4(10)    | .999       | 0.318 <sup>a</sup> |
|            | NO  | 37(94.9)          | 17(94.4) | 9(81.8) |            |                    | 27(96.4)            | 36(90)   |            |                    |
| Father TB  | YES | 0(0)              | 0(0)     | 0(0)    | ----       | ----               | 0(0)                | 0(0)     | ----       | ----               |
|            | NO  | 39(100)           | 18(100)  | 11(100) |            |                    | 28(100)             | 40(100)  |            |                    |
| Father OB  | YES | 2(5.1)            | 1(5.6)   | 2(18.2) | 2.262      | 0.323 <sup>a</sup> | 2(7.1)              | 3(7.5)   | .003       | 0.956 <sup>a</sup> |
|            | NO  | 37(94.9)          | 17(94.4) | 9(81.8) |            |                    | 26(92.9)            | 37(92.5) |            |                    |
| Father MS  | YES | 1(2.6)            | 1(5.6)   | 0(0)    | 0.784      | 0.676 <sup>a</sup> | 1(3.6)              | 1(2.5)   | .066       | 0.797 <sup>a</sup> |

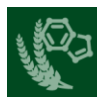

|                                     |            |          |          |          |       |                    |          |          |       |                    |
|-------------------------------------|------------|----------|----------|----------|-------|--------------------|----------|----------|-------|--------------------|
|                                     | NO         | 38(97.4) | 17(94.4) | 11(100)  |       |                    | 27(96.4) | 39(97.5) |       |                    |
| Mother DBT                          | YES        | 5(11.9)  | 1(5.6)   | 3(25)    | 2.522 | 0.283 <sup>a</sup> | 2(6.7)   | 7(16.7)  | 1.600 | 0.206 <sup>a</sup> |
|                                     | NO         | 37(88.1) | 17(94.4) | 9(75)    |       |                    | 28(93.3) | 35(83.3) |       |                    |
| Mother HTN                          | YES        | 5(11.9)  | 3(16.7)  | 4(33.3)  | 3.086 | 0.214 <sup>a</sup> | 4(13.3)  | 8(19)    | .411  | 0.521 <sup>a</sup> |
|                                     | NO         | 37(88.1) | 15(83.3) | 8(66.7)  |       |                    | 26(86.7) | 34(81)   |       |                    |
| Mother TB                           | YES        | 1(2.4)   | 1(5.6)   | 0(0)     | 0.882 | 0.644 <sup>a</sup> | 0(0)     | 2(4.8)   | 1.469 | 0.225 <sup>a</sup> |
|                                     | NO         | 41(97.6) | 17(94.4) | 12(100)  |       |                    | 30(100)  | 40(95.2) |       |                    |
| Mother OB                           | YES        | 1(2.4)   | 1(5.6)   | 1(8.3)   | 0.944 | 0.624 <sup>a</sup> | 1(3.3)   | 2(4.8)   | .089  | 0.765 <sup>a</sup> |
|                                     | NO         | 41(97.6) | 17(94.4) | 11(91.7) |       |                    | 29(96.7) | 40(95.2) |       |                    |
| Mother MS                           | YES        | 1(2.4)   | 1(5.6)   | 1(8.3)   | 0.944 | 0.624 <sup>a</sup> | 1(3.3)   | 2(4.8)   | .089  | 0.765 <sup>a</sup> |
|                                     | NO         | 41(97.6) | 17(94.4) | 11(91.7) |       |                    | 29(96.7) | 40(95.2) |       |                    |
| Brother DBT                         | YES        | 4(9.5)   | 0(0)     | 1(8.3)   | 1.812 | 0.404 <sup>a</sup> | 1(3.3)   | 4(9.5)   | 1.038 | 0.308 <sup>a</sup> |
|                                     | NO         | 38(90.5) | 18(100)  | 11(91.7) |       |                    | 29(96.7) | 38(90.5) |       |                    |
| Brother HTN                         | YES        | 2(4.8)   | 0(0)     | 0(0)     | 1.469 | 0.480 <sup>a</sup> | 0(0)     | 2(4.8)   | 1.469 | 0.225 <sup>a</sup> |
|                                     | NO         | 40(95.2) | 18(100)  | 12(100)  |       |                    | 30(100)  | 40(95.2) |       |                    |
| Brother TB                          | YES        | 1(2.4)   | 0(0)     | 1(8.3)   | 1.910 | 0.385 <sup>a</sup> | 0(0)     | 2(4.8)   | 1.469 | 0.225 <sup>a</sup> |
|                                     | NO         | 41(97.6) | 18(100)  | 11(91.7) |       |                    | 30(100)  | 40(95.2) |       |                    |
| Brother OB                          | YES        | 1(2.4)   | 1(5.6)   | 0(0)     | 0.882 | 0.644 <sup>a</sup> | 0(0)     | 2(4.8)   | 1.469 | 0.225 <sup>a</sup> |
|                                     | NO         | 41(97.6) | 17(94.4) | 12(100)  |       |                    | 30(100)  | 40(95.2) |       |                    |
| Brother MS                          | YES        | 1(2.4)   | 0(0)     | 0(0)     | 0.724 | 0.696 <sup>a</sup> | 0(0)     | 1(2.4)   | .725  | 0.395 <sup>a</sup> |
|                                     | NO         | 41(97.6) | 18(100)  | 12(100)  |       |                    | 30(100)  | 41(97.6) |       |                    |
| Alcohol                             | YES        | 0(0)     | 0(0)     | 0(0)     | 8.471 | 0.076 <sup>a</sup> | 0(0)     | 0(0)     | 2.261 | 0.323 <sup>a</sup> |
|                                     | wkends     | 0(0)     | 0(0)     | 1(8.3)   |       |                    | 0(0)     | 1(2.4)   |       |                    |
|                                     | Occas      | 6(14.3)  | 2(11.1)  | 4(33.3)  |       |                    | 7(23.3)  | 5(11.9)  |       |                    |
|                                     | Never      | 36(85.7) | 16(88.9) | 7(58.3)  |       |                    | 23(76.7) | 36(85.7) |       |                    |
| Tabacco                             | YES        | 14(33.3) | 5(27.8)  | 5(41.7)  | 5.429 | 0.246 <sup>a</sup> | 9(30)    | 15(35.7) | .862  | 0.350 <sup>a</sup> |
|                                     | Occas      | 3(7.1)   | 1(5.6)   | 3(25)    |       |                    | 4(13.3)  | 3(7.1)   |       |                    |
|                                     | Never      | 25(59.5) | 12(66.7) | 4(33.3)  |       |                    | 17(56.7) | 24(57.1) |       |                    |
| Drugs                               | YES        | 0(0)     | 0(0)     | 0(0)     | ----  | ----               | 0(0)     | 0(0)     | ----  | ----               |
|                                     | NO         | 42(100)  | 18(100)  | 12(100)  |       |                    | 30(100)  | 42(100)  |       |                    |
| Cancer                              | YES        | 0(0)     | 0(0)     | 0(0)     | ----  | ----               | 0(0)     | 0(0)     | ----  | ----               |
|                                     | NO         | 42(100)  | 18(100)  | 12(100)  |       |                    | 30(100)  | 42(100)  |       |                    |
| Alergies                            | 1          | 8(0)     | 1(0)     | 1(0)     | 2.128 | 0.345 <sup>a</sup> | 4(0)     | 6(0)     | .024  | 0.876 <sup>a</sup> |
|                                     | 2          | 34(0)    | 16(0)    | 11(0)    |       |                    | 26(0)    | 35(0)    |       |                    |
| NB Sex                              | Male       | 14(35)   | 11(73.3) | 6(50)    | 6.530 | 0.380 <sup>a</sup> | 11(39.3) | 20(51.3) | .943  | 0.331 <sup>a</sup> |
|                                     | Female     | 26(65)   | 4(26.7)  | 6(50)    |       |                    | 17(60.7) | 19(48.7) |       |                    |
| Antibiotic use                      | YES        | 22(53.7) | 7(38.9)  | 3(27.3)  | 2.888 | 0.236 <sup>a</sup> | 13(44.8) | 19(46.3) | .016  | 0.900 <sup>a</sup> |
|                                     | NO         | 19(46.3) | 11(61.1) | 8(72.7)  |       |                    | 16(55.2) | 22(53.7) |       |                    |
| Antibiotic use in the last 6 months | YES        | 22(53.7) | 8(44.4)  | 4(36.4)  | 1.204 | 0.548 <sup>a</sup> | 9(31)    | 25(61)   | 6.096 | 0.017 <sup>a</sup> |
|                                     | NO         | 19(46.3) | 10(55.6) | 7(63.6)  |       |                    | 20(69)   | 16(39)   |       |                    |
| Other medication                    | YES        | 31(73.8) | 9(52.9)  | 6(54.5)  | 3.062 | 0.216 <sup>a</sup> | 21(70)   | 25(62.5) | .428  | 0.513 <sup>a</sup> |
|                                     | NO         | 11(26.2) | 8(47.1)  | 5(45.5)  |       |                    | 9(30)    | 15(37.5) |       |                    |
| BMI                                 | underweigh | 0(0)     | 0(0)     | 1(9.1)   | 6.119 | 0.410 <sup>a</sup> | 1(3.6)   | 0(0)     | 2.842 | 0.417 <sup>a</sup> |
|                                     | normal     | 11(27.5) | 5(27.8)  | 4(36.4)  |       |                    | 10(35.7) | 10(24.4) |       |                    |
|                                     | overweigh  | 17(42.5) | 7(38.9)  | 3(27.3)  |       |                    | 9(32.1)  | 18(43.9) |       |                    |



|                        |         |          |          |          |       |                    |          |          |       |                    |
|------------------------|---------|----------|----------|----------|-------|--------------------|----------|----------|-------|--------------------|
|                        | obesity | 12(30)   | 6(33.3)  | 3(27.3)  |       |                    | 8(28.6)  | 13(31.7) |       |                    |
| NNS consumption        | NO      | 21(50)   | 6(33.3)  | 4(33.3)  | 1.983 | 0.371 <sup>a</sup> | 16(53.3) | 15(35.7) | 2.216 | 0.137 <sup>a</sup> |
|                        | YES     | 21(50)   | 12(66.7) | 8(66.7)  |       |                    | 14(46.7) | 27(64.3) |       |                    |
| milk                   | NO      | 1(2.4)   | 0(0)     | 0(0)     | 0.724 | 0.696 <sup>a</sup> | 0(0)     | 1(2.4)   | .724  | 0.395 <sup>a</sup> |
|                        | YES     | 41(97.6) | 18(100)  | 12(100)  |       |                    | 30(100)  | 41(97.6) |       |                    |
| yogurt                 | YES     | 40(95.2) | 17(94.4) | 10(83.3) | 2.119 | 0.347 <sup>a</sup> | 29(96.7) | 38(90.5) | 1.038 | 0.308 <sup>a</sup> |
|                        | NO      | 2(4.8)   | 1(5.6)   | 2(16.7)  |       |                    | 1(3.3)   | 4(9.5)   |       |                    |
| Chocolate              | YES     | 32(76.2) | 14(77.8) | 9(75)    | 0.033 | 0.984 <sup>a</sup> | 22(73.3) | 33(78.6) | .266  | 0.606 <sup>a</sup> |
|                        | NO      | 10(23.8) | 4(22.2)  | 3(25)    |       |                    | 8(26.7)  | 9(21.4)  |       |                    |
| Popped cereals         | YES     | 35(83.3) | 14(77.8) | 11(91.7) | 1.000 | 0.607 <sup>a</sup> | 24(80)   | 36(85.7) | .411  | 0.521 <sup>a</sup> |
|                        | NO      | 7(16.7)  | 4(22.2)  | 1(8.3)   |       |                    | 6(20)    | 6(14.3)  |       |                    |
| Coookies Maria style   | YES     | 28(66.7) | 10(55.6) | 7(58.3)  | 0.770 | 0.680 <sup>a</sup> | 18(60)   | 27(64.3) | .137  | 0.711 <sup>a</sup> |
|                        | NO      | 14(33.3) | 8(44.4)  | 5(41.7)  |       |                    | 12(40)   | 15(35.7) |       |                    |
| Choco-cream cockies    | YES     | 29(69)   | 11(61.1) | 8(66.7)  | 0.357 | 0.836 <sup>a</sup> | 19(63.3) | 29(69)   | .257  | 0.612 <sup>a</sup> |
|                        | NO      | 13(31)   | 7(38.9)  | 4(33.3)  |       |                    | 11(36.7) | 13(31)   |       |                    |
| muffines               | YES     | 29(69)   | 11(61.1) | 7(58.3)  | 0.657 | 0.720 <sup>a</sup> | 19(63.3) | 28(66.7) | .086  | 0.770 <sup>a</sup> |
|                        | NO      | 13(31)   | 7(38.9)  | 5(41.7)  |       |                    | 11(36.7) | 14(33.3) |       |                    |
| Donuts and croassants  | YES     | 19(45.2) | 6(33.3)  | 6(50)    | 1.012 | 0.603 <sup>a</sup> | 14(46.7) | 17(40.5) | .274  | 0.601 <sup>a</sup> |
|                        | NO      | 23(54.8) | 12(66.7) | 6(50)    |       |                    | 16(53.3) | 25(59.5) |       |                    |
| Salad                  | YES     | 36(85.7) | 14(77.8) | 12(100)  | 2.986 | 0.225 <sup>a</sup> | 22(73.3) | 40(95.2) | 7.021 | 0.008 <sup>a</sup> |
|                        | NO      | 6(14.3)  | 4(22.2)  | 0(0)     |       |                    | 8(26.7)  | 2(4.8)   |       |                    |
| Spinach, swiss chard   | YES     | 25(59.5) | 8(44.4)  | 10(83.3) | 4.528 | 0.104 <sup>a</sup> | 20(66.7) | 23(54.8) | 1.031 | 0.310 <sup>a</sup> |
|                        | NO      | 17(40.5) | 10(55.6) | 2(16.7)  |       |                    | 10(33.3) | 19(45.2) |       |                    |
| Vegetables on the side | YES     | 28(66.7) | 12(66.7) | 10(83.3) | 1.309 | 0.520 <sup>a</sup> | 22(73.3) | 28(66.7) | .367  | 0.545 <sup>a</sup> |
|                        | NO      | 14(33.3) | 6(33.3)  | 2(16.7)  |       |                    | 8(26.7)  | 14(33.3) |       |                    |
| Potatoes               | YES     | 36(85.7) | 15(83.3) | 12(100)  | 2.122 | 0.346 <sup>a</sup> | 26(86.7) | 37(88.1) | .033  | 0.857 <sup>a</sup> |
|                        | NO      | 6(14.3)  | 3(16.7)  | 0(0)     |       |                    | 4(13.3)  | 5(11.9)  |       |                    |
| Legumes                | YES     | 38(90.5) | 16(88.9) | 10(83.3) | 0.482 | 0.786 <sup>a</sup> | 26(86.7) | 38(90.5) | .257  | 0.612 <sup>a</sup> |
|                        | NO      | 4(9.5)   | 2(11.1)  | 2(16.7)  |       |                    | 4(13.3)  | 4(9.5)   |       |                    |
| Rice                   | YES     | 38(90.5) | 17(94.4) | 11(91.7) | 0.260 | 0.878 <sup>a</sup> | 29(96.7) | 37(88.1) | 1.683 | 0.195 <sup>a</sup> |
|                        | NO      | 4(9.5)   | 1(5.6)   | 1(8.3)   |       |                    | 1(3.3)   | 5(11.9)  |       |                    |
| Pasta                  | YES     | 41(97.6) | 17(94.4) | 12(100)  | 0.882 | 0.644 <sup>a</sup> | 29(96.7) | 41(97.6) | .059  | 0.808 <sup>a</sup> |
|                        | NO      | 1(2.4)   | 1(5.6)   | 0(0)     |       |                    | 1(3.3)   | 1(2.4)   |       |                    |
| Creamy soups           | YES     | 23(54.8) | 12(66.7) | 9(75)    | 1.920 | 0.383 <sup>a</sup> | 18(60)   | 26(61.9) | .027  | 0.870 <sup>a</sup> |
|                        | NO      | 19(45.2) | 6(33.3)  | 3(25)    |       |                    | 12(40)   | 16(38.1) |       |                    |
| Eggs                   | YES     | 37(88.1) | 16(88.9) | 11(91.7) | 0.121 | 0.642 <sup>a</sup> | 27(90)   | 37(88.1) | .064  | 0.800 <sup>a</sup> |
|                        | NO      | 5(11.9)  | 2(11.1)  | 1(8.3)   |       |                    | 3(10)    | 5(11.9)  |       |                    |
| Chicken, turkey        | YES     | 41(97.6) | 16(88.9) | 12(100)  | 3.031 | 0.220 <sup>a</sup> | 29(96.7) | 40(95.2) | .089  | 0.765 <sup>a</sup> |
|                        | NO      | 1(2.4)   | 2(11.1)  | 0(0)     |       |                    | 1(3.3)   | 2(4.8)   |       |                    |
| Beef, pig, lamb        | YES     | 39(92.9) | 17(94.4) | 10(83.3) | 1.351 | 0.509 <sup>a</sup> | 29(96.7) | 37(88.1) | 1.683 | 0.195 <sup>a</sup> |
|                        | NO      | 3(7.1)   | 1(5.6)   | 2(16.7)  |       |                    | 1(3.3)   | 5(11.9)  |       |                    |
| Minced meat            | YES     | 29(69)   | 14(77.8) | 8(66.7)  | 0.586 | 0.746 <sup>a</sup> | 20(66.7) | 31(73.8) | .432  | 0.511 <sup>a</sup> |
|                        | NO      | 13(31)   | 4(22.2)  | 4(33.3)  |       |                    | 10(33.3) | 11(26.2) |       |                    |
| White fish             | YES     | 22(52.4) | 8(44.4)  | 8(66.7)  | 1.433 | 0.488 <sup>a</sup> | 13(43.3) | 25(59.5) | 1.841 | 0.175 <sup>a</sup> |
|                        | NO      | 20(47.6) | 10(55.6) | 4(33.3)  |       |                    | 17(56.7) | 17(40.5) |       |                    |



|                        |     |          |          |          |       |                    |          |          |       |                    |
|------------------------|-----|----------|----------|----------|-------|--------------------|----------|----------|-------|--------------------|
| Blue fish              | YES | 14(33.3) | 8(44.4)  | 7(58.3)  | 2.598 | 0.273 <sup>a</sup> | 13(43.3) | 16(38.1) | .200  | 0.655 <sup>a</sup> |
|                        | NO  | 28(66.7) | 10(55.6) | 5(41.7)  |       |                    | 17(56.7) | 26(61.9) |       |                    |
| Seafood                | YES | 15(35.7) | 7(38.9)  | 3(25)    | 0.657 | 0.720 <sup>a</sup> | 9(30)    | 16(38.1) | .506  | 0.477 <sup>a</sup> |
|                        | NO  | 27(64.3) | 11(61.1) | 9(75)    |       |                    | 21(70)   | 26(61.9) |       |                    |
| Croquettes             | YES | 23(54.8) | 10(55.6) | 9(75)    | 1.649 | 0.438 <sup>a</sup> | 17(56.7) | 25(59.5) | .059  | 0.808 <sup>a</sup> |
|                        | NO  | 19(45.2) | 8(44.4)  | 3(25)    |       |                    | 13(43.3) | 17(40.5) |       |                    |
| Berad                  | YES | 24(57.1) | 12(66.7) | 9(75)    | 1.448 | 0.485 <sup>a</sup> | 23(76.7) | 22(52.4) | 4.404 | 0.036 <sup>a</sup> |
|                        | NO  | 18(42.9) | 6(33.3)  | 3(25)    |       |                    | 7(23.3)  | 20(47.6) |       |                    |
| Ham                    | YES | 38(90.5) | 15(83.3) | 10(83.3) | 0.816 | 0.665 <sup>a</sup> | 27(90)   | 36(85.7) | .294  | 0.588 <sup>a</sup> |
|                        | NO  | 4(9.5)   | 3(16.7)  | 2(16.7)  |       |                    | 3(10)    | 6(14.3)  |       |                    |
| White cheese           | YES | 36(85.7) | 15(83.3) | 11(91.7) | 0.431 | 0.806 <sup>a</sup> | 26(86.7) | 36(85.7) | .013  | 0.908 <sup>a</sup> |
|                        | NO  | 6(14.3)  | 3(16.7)  | 1(8.3)   |       |                    | 4(13.3)  | 6(14.3)  |       |                    |
| Other cheese           | YES | 22(52.4) | 6(33.3)  | 5(41.7)  | 1.942 | 0.379 <sup>a</sup> | 16(53.3) | 17(40.5) | 1.165 | 0.280 <sup>a</sup> |
|                        | NO  | 20(47.6) | 12(66.7) | 7(58.3)  |       |                    | 14(46.7) | 25(59.5) |       |                    |
| Citric fruits          | YES | 40(95.2) | 17(94.4) | 12(100)  | 0.646 | 0.724 <sup>a</sup> | 29(96.7) | 40(95.2) | .089  | 0.765 <sup>a</sup> |
|                        | NO  | 2(4.8)   | 1(5.6)   | 0(0)     |       |                    | 1(3.3)   | 2(4.8)   |       |                    |
| Other fruits           | YES | 38(90.5) | 17(94.4) | 12(100)  | 1.382 | 0.501 <sup>a</sup> | 26(86.7) | 41(97.6) | 3.248 | 0.071 <sup>a</sup> |
|                        | NO  | 4(9.5)   | 1(5.6)   | 0(0)     |       |                    | 4(13.3)  | 1(2.4)   |       |                    |
| Canned fruit           | YES | 15(35.7) | 5(27.8)  | 4(33.3)  | 0.357 | 0.836 <sup>a</sup> | 11(36.7) | 13(31)   | .257  | 0.612 <sup>a</sup> |
|                        | NO  | 27(64.3) | 13(72.2) | 8(66.7)  |       |                    | 19(63.3) | 29(69)   |       |                    |
| Natural fruit juice    | YES | 31(73.8) | 11(61.1) | 11(91.7) | 3.463 | 0.177 <sup>a</sup> | 23(76.7) | 30(71.4) | .247  | 0.619 <sup>a</sup> |
|                        | NO  | 11(26.2) | 7(38.9)  | 1(8.3)   |       |                    | 7(23.3)  | 12(28.6) |       |                    |
| Commercial fruit juice | YES | 28(66.7) | 14(77.8) | 3(25)    | 9.304 | 0.010 <sup>a</sup> | 17(56.7) | 28(66.7) | .747  | 0.388 <sup>a</sup> |
|                        | NO  | 14(33.3) | 4(22.2)  | 9(75)    |       |                    | 13(43.3) | 14(33.3) |       |                    |
| Nuts                   | YES | 25(59.5) | 11(61.1) | 8(66.7)  | 0.200 | 0.905 <sup>a</sup> | 19(63.3) | 25(59.5) | .107  | 0.744 <sup>a</sup> |
|                        | NO  | 17(40.5) | 7(38.9)  | 4(33.3)  |       |                    | 11(36.7) | 17(40.5) |       |                    |
| Dairy desserts         | YES | 22(52.4) | 8(44.4)  | 6(50)    | 0.317 | 0.853 <sup>a</sup> | 17(56.7) | 19(45.2) | .914  | 0.339 <sup>a</sup> |
|                        | NO  | 20(47.6) | 10(55.6) | 6(50)    |       |                    | 13(43.3) | 23(54.8) |       |                    |
| Cakes                  | YES | 13(31)   | 11(61.1) | 5(41.7)  | 4.776 | 0.092 <sup>a</sup> | 11(36.7) | 18(42.9) | .279  | 0.597 <sup>a</sup> |
|                        | NO  | 29(69)   | 7(38.9)  | 7(58.3)  |       |                    | 19(63.3) | 24(57.1) |       |                    |
| Fry bags               | YES | 30(71.4) | 14(77.8) | 7(58.3)  | 1.335 | 0.513 <sup>a</sup> | 24(80)   | 27(64.3) | 2.092 | 0.148 <sup>a</sup> |
|                        | NO  | 12(28.6) | 4(22.2)  | 5(41.7)  |       |                    | 6(20)    | 15(35.7) |       |                    |
| Candies                | YES | 31(73.8) | 12(66.7) | 8(66.7)  | 0.432 | 0.806 <sup>a</sup> | 21(70)   | 30(71.4) | .017  | 0.895 <sup>a</sup> |
|                        | NO  | 11(26.2) | 6(33.3)  | 4(33.3)  |       |                    | 9(30)    | 12(28.6) |       |                    |
| Ice cream              | YES | 29(69)   | 12(66.7) | 10(83.3) | 1.124 | 0.570 <sup>a</sup> | 20(66.7) | 31(73.8) | .432  | 0.511 <sup>a</sup> |
|                        | NO  | 13(31)   | 6(33.3)  | 2(16.7)  |       |                    | 10(33.3) | 11(26.2) |       |                    |
| Soda                   | YES | 27(64.3) | 16(88.9) | 6(50)    | 5.668 | 0.059 <sup>a</sup> | 18(60)   | 31(73.8) | 1.535 | 0.215 <sup>a</sup> |
|                        | NO  | 15(35.7) | 2(11.1)  | 6(50)    |       |                    | 12(40)   | 11(26.2) |       |                    |
| Ligth soda             | YES | 2(4.8)   | 3(16.7)  | 1(8.3)   | 2.338 | 0.311 <sup>a</sup> | 4(13.3)  | 2(4.8)   | .1683 | 0.195 <sup>a</sup> |
|                        | NO  | 40(95.2) | 15(83.3) | 11(91.7) |       |                    | 26(86.7) | 40(95.2) |       |                    |
| Wine                   | YES | 2(4.8)   | 1(5.6)   | 2(16.7)  | 2.119 | 0.347 <sup>a</sup> | 3(10)    | 2(4.8)   | .743  | 0.389 <sup>a</sup> |
|                        | NO  | 40(95.2) | 17(94.4) | 10(83.3) |       |                    | 27(90)   | 40(95.2) |       |                    |
| Beer                   | YES | 11(26.2) | 3(16.7)  | 4(33.3)  | 1.143 | 0.565 <sup>a</sup> | 9(30)    | 9(21.4)  | .686  | 0.408 <sup>a</sup> |
|                        | NO  | 31(73.8) | 15(83.3) | 8(66.7)  |       |                    | 21(70)   | 33(78.6) |       |                    |
|                        | YES | 1(2.4)   | 0(0)     | 0(0)     | 0.724 | 0.696 <sup>a</sup> | 1(3.3)   | 0(0)     | 1.420 | 0.233 <sup>a</sup> |



|                                   |     |                |                 |                |       |                    |                |                 |        |                    |
|-----------------------------------|-----|----------------|-----------------|----------------|-------|--------------------|----------------|-----------------|--------|--------------------|
| Non-alcohol beer                  | NO  | 41(97.6)       | 18(100)         | 12(100)        |       |                    | 29(96.7)       | 42(100)         |        |                    |
| Distilled drinks                  | YES | 3(7.1)         | 0(0)            | 2(16.7)        | 3.101 | 0.212 <sup>a</sup> | 3(10)          | 2(4.8)          | .743   | 0.389 <sup>a</sup> |
|                                   | NO  | 39(92.9)       | 18(100)         | 10(83.3)       |       |                    | 27(90)         | 40(95.2)        |        |                    |
| Age, years                        |     | 23.9±4.56      | 25.16±6.97      | 25.17±4.3      | 0.510 | 0.603 <sup>b</sup> | 24.1±5.12      | 24.67±5.33      | -0.487 | 0.628 <sup>c</sup> |
| Brothers, n                       |     | 2.68±1.6       | 2.94±1.92       | 2.18±0.98      | 0.761 | 0.471 <sup>b</sup> | 2.5±1.59       | 2.8±1.64        | -0.745 | 0.459 <sup>c</sup> |
| Children, n                       |     | 1.48±0.63      | 1.78±1.06       | 1.92±0.79      | 1.925 | 0.154 <sup>b</sup> | 1.67±0.84      | 1.6±0.77        | 0.295  | 0.769 <sup>c</sup> |
| Gestational age (LMP/USG), weeks  |     | 38.82±1.77     | 38.88±1.95      | 39.05±1.5      | 0.076 | 0.927 <sup>b</sup> | 39.08±1.81     | 38.72±1.72      | 0.949  | 0.346 <sup>c</sup> |
| Age of menarch                    |     | 12.51±1.73     | 12.63±1.34      | 12.42±1.44     | 0.071 | 0.931 <sup>b</sup> | 12.53±1.8      | 12.52±1.42      | 0.186  | 0.853 <sup>c</sup> |
| Age of sexual initiation, years   |     | 17.56±2.09     | 17.11±3.14      | 17.25±2.77     | 0.226 | 0.798 <sup>b</sup> | 17.37±2.53     | 17.41±2.47      | -0.055 | 0.956 <sup>c</sup> |
| Pregnancies, n                    |     | 1.9±0.86       | 2.21±0.98       | 2.42±1.08      | 1.716 | 0.187 <sup>b</sup> | 1.97±1.07      | 2.14±0.84       | -0.905 | 0.369 <sup>c</sup> |
| Births, n                         |     | 0.83±0.77      | 1.21±1.08       | 0.92±1.24      | 1.058 | 0.353 <sup>b</sup> | 0.97±1.13      | 0.93±0.81       | 0.173  | 0.864 <sup>c</sup> |
| C-sections, n                     |     | 0.68±0.85      | 0.58±0.84       | 1±1.21         | 0.819 | 0.445 <sup>b</sup> | 0.67±0.84      | 0.74±0.96       | -0.405 | 0.687 <sup>c</sup> |
| Abortions, n                      |     | 0.36±0.53      | 0.26±0.45       | 0.25±0.62      | 0.315 | 0.731 <sup>b</sup> | 0.2±0.41       | 0.4±0.58        | -1.648 | 0.104 <sup>c</sup> |
| Gestational Age by Capurro, weeks |     | 39.61±2.45     | 39.45±1.5       | 40.01±1.35     | 0.259 | 0.773 <sup>b</sup> | 39.53±1.71     | 39.72±2.33      | -0.365 | 0.716 <sup>c</sup> |
| Mothers temperature, °C           |     | 36.49±0.4      | 36.42±0.47      | 36.37±0.24     | 0.474 | 0.265 <sup>b</sup> | 36.39±0.39     | 36.5±0.4        | -0.980 | 0.330 <sup>c</sup> |
| Mother's systolic pressure, mmHg  |     | 104.8±11.2     | 106±10.2        | 102.91±7.82    | 0.302 | 0.740 <sup>b</sup> | 105.59±10.13   | 104.31±10.67    | 0.661  | 0.511 <sup>c</sup> |
| Mother's diastolic pressure, mmHg |     | 67.68±10.86    | 69.74±7.72      | 68.18±10.79    | 0.269 | 0.765 <sup>b</sup> | 70.17±8.18     | 67.02±11        | 1.325  | 0.190 <sup>c</sup> |
| Mother's height, cm               |     | 1.58±0.07      | 1.59±0.07       | 1.6±0.09       | 0.346 | 0.709 <sup>b</sup> | 1.6±0.07       | 1.57±0.07       | 1.582  | 0.118 <sup>c</sup> |
| Mothers weight after delivery, kg |     | 68.81±14.45    | 70.55±15.11     | 68.11±15.46    | 0.123 | 0.885 <sup>b</sup> | 69±15.55       | 69.29±14.11     | -0.066 | 0.947 <sup>c</sup> |
| Mother's lean mass, %             |     | 20.6±9.81      | 20.3±8.57       | 17.71±12.77    | 0.302 | 0.741 <sup>b</sup> | 20.88±11.15    | 19.49±8.94      | 0.529  | 0.599 <sup>c</sup> |
| Mothers fat mass, %               |     | 27.76±7.65     | 30.15±10.09     | 23.29±14.55    | 1.482 | 0.236 <sup>b</sup> | 27.88±8.87     | 27.69±10.45     | 0.076  | 0.940 <sup>c</sup> |
| Mothers lean mass, kg             |     | 50.7±9         | 45.35±7.02      | 51.53±8.84     | 2.608 | 0.083 <sup>b</sup> | 49.25±8.21     | 49.27±9.13      | -0.009 | 0.993 <sup>c</sup> |
| Mother's fat mass, kg             |     | 72.26±7.65     | 69.85±10.09     | 76.71±14.55    | 1.482 | 0.236 <sup>b</sup> | 72.15±8.88     | 72.31±10.45     | -0.063 | 0.950 <sup>c</sup> |
| Mothers total body water, kg      |     | 35.78±6.39     | 31.62±5.51      | 36.92±6.73     | 3.151 | 0.051 <sup>b</sup> | 34.83±6.03     | 34.67±6.79      | 0.096  | 0.924 <sup>c</sup> |
| Mother's total body water, %      |     | 51.03±5.6      | 47.51±10.49     | 55±10.98       | 2.548 | 0.087 <sup>b</sup> | 51.02±6.49     | 50.32±9.64      | 0.309  | 0.758 <sup>c</sup> |
| Newborn's temperature, °C         |     | 36.89±0.3      | 36.73±0.36      | 36.97±0.2      | 2.589 | 0.083 <sup>b</sup> | 36.89±0.21     | 36.84±0.37      | 0.694  | 0.490 <sup>c</sup> |
| Newborn's length, cm              |     | 49.05±2.12     | 49.17±2.38      | 48.82±3.71     | 0.067 | 0.935 <sup>b</sup> | 49.14±2.18     | 48.98±2.65      | 0.269  | 0.789 <sup>c</sup> |
| Newborn's weight, kg              |     | 3.17±0.45      | 3.2±0.39        | 3.21±0.52      | 0.043 | 0.958 <sup>b</sup> | 3.11±0.43      | 3.23±0.44       | -1.053 | 0.296 <sup>c</sup> |
| Mother's BMI                      |     | 564.97±1242.72 | 1922.07±3584.44 | 166.61±221.81  | 0.200 | 0.819 <sup>b</sup> | 548.62±1261.81 | 1064.86±2559.29 | -0.922 | 0.360 <sup>c</sup> |
| NNS, mg/week                      |     | 564.97±1242.72 | 1922.07±3584.44 | 166.61±221.81  | 3.659 | 0.031 <sup>b</sup> | 548.62±1261.81 | 1064.86±2559.29 | -1.058 | 0.294 <sup>c</sup> |
| Yogurts, times/week               |     | 1.55±2.29      | 1.26±1.37       | 2±2.41         | 0.448 | 0.641 <sup>b</sup> | 0.9±1.67       | 2±2.26          | -2.161 | 0.034 <sup>c</sup> |
| Jams, times/week                  |     | 0.79±2.09      | 1.37±2.01       | 0.5±1.24       | 0.864 | 0.426 <sup>b</sup> | 0.83±2.23      | 0.93±1.76       | -0.252 | 0.802 <sup>c</sup> |
| Candies, times/week               |     | 3.4±4.38       | 2.95±3.61       | 2.67±3.45      | 0.191 | 0.826 <sup>b</sup> | 3.07±4.57      | 3.23±3.62       | -0.251 | 0.803 <sup>c</sup> |
| ASB, times/week                   |     | 0.98±2.39      | 0.74±2.33       | 0.33±1.15      | 0.402 | 0.671 <sup>b</sup> | 0.93±2.49      | 0.72±2.02       | 0.365  | 0.716 <sup>c</sup> |
| Cereals, times/week               |     | 0.81±2.06      | 0±0             | 0.5±1.73       | 1.452 | 0.241 <sup>b</sup> | 1.07±2.43      | 0.19±0.85       | 2.156  | 0.035 <sup>c</sup> |
| Sweeteners, times/week            |     | 10.76±12.71    | 8.95±6.71       | 10.33±7.28     | 0.189 | 0.828 <sup>b</sup> | 9.53±13.78     | 10.7±7.77       | -0.518 | 0.606 <sup>c</sup> |
| NNS, times/week                   |     | 12.6±12.57     | 14.79±11.18     | 12.08±11.2     | 0.268 | 0.766 <sup>b</sup> | 11.7±11.09     | 14.05±12.47     | -0.906 | 0.368 <sup>c</sup> |
| Energy, kcal                      |     | 1298.61±598.67 | 1196.32±895.36  | 1474.13±848.72 | 0.537 | 0.587 <sup>b</sup> | 1352.17±721.06 | 1265.03±730.37  | 0.345  | 0.731 <sup>c</sup> |
| Lipids, g                         |     | 48.49±26.66    | 42.69±33.99     | 56.66±48.91    | 0.660 | 0.520 <sup>b</sup> | 53.14±36.28    | 44.96±30.22     | 0.915  | 0.363 <sup>c</sup> |
| Proteins, g                       |     | 60.58±25.81    | 55.89±35.4      | 73.67±40.37    | 1.244 | 0.294 <sup>b</sup> | 65.12±31.47    | 58.99±31.17     | 0.655  | 0.514 <sup>c</sup> |
| HCO, g                            |     | 156.53±84.05   | 148.14±136.56   | 168.08±74.34   | 0.150 | 0.861 <sup>b</sup> | 155.09±89.35   | 157.05±104.36   | -0.227 | 0.821 <sup>c</sup> |
| Fiber, g                          |     | 11.46±7.88     | 9.28±6.37       | 9.7±6.14       | 0.700 | 0.500 <sup>b</sup> | 10.41±7.52     | 10.73±7.1       | -0.310 | 0.758 <sup>c</sup> |
| Iron, mg                          |     | 8.75±4.74      | 7.86±7.14       | 9.13±4.95      | 0.241 | 0.787 <sup>b</sup> | 9.75±6.02      | 7.77±4.88       | 1.420  | 0.160 <sup>c</sup> |



|                                     |                |                 |                 |       |                    |                 |                 |        |                    |
|-------------------------------------|----------------|-----------------|-----------------|-------|--------------------|-----------------|-----------------|--------|--------------------|
| Sodium, mg                          | 1081.53±989.56 | 1019.34±1082.26 | 1623.53±1622.59 | 1.246 | 0.294 <sup>b</sup> | 1084.57±1312.49 | 1203.18±1014.16 | -0.535 | 0.594 <sup>c</sup> |
| Potassium, mg                       | 752.45±792.19  | 514.72±502.69   | 1024.65±742.98  | 1.869 | 0.162 <sup>b</sup> | 818.07±847.59   | 677.59±638.26   | 0.724  | 0.472 <sup>c</sup> |
| Calcium mg                          | 558.75±328.89  | 536.13±596.16   | 627.39±570.55   | 0.156 | 0.856 <sup>b</sup> | 510.96±369.38   | 601.25±497.05   | -0.956 | 0.342 <sup>c</sup> |
| Phosphorus, mg                      | 27.44±54.54    | 29.61±67.22     | 15.35±37.18     | 0.271 | 0.763 <sup>b</sup> | 26.98±52.56     | 25.3±57.81      | 0.079  | 0.937 <sup>c</sup> |
| Sugar, g                            | 33.35±32.67    | 17.48±22.33     | 40.28±35.7      | 2.468 | 0.092 <sup>b</sup> | 36.05±33.09     | 26.38±30.1      | 1.213  | 0.229 <sup>c</sup> |
| Vitamin A, µg                       | 359.32±396.57  | 319.54±301.04   | 387.11±229.5    | 0.149 | 0.862 <sup>b</sup> | 312.23±244.63   | 382.35±404.53   | -0.938 | 0.351 <sup>c</sup> |
| Vitamin B9, µg                      | 120.06±139.82  | 94.68±69.82     | 183.81±122.88   | 1.987 | 0.145 <sup>b</sup> | 146.87±145.41   | 107.93±106.38   | 1.231  | 0.222 <sup>c</sup> |
| Vitamin C, mg                       | 86.06±143.35   | 69.51±114.63    | 112.1±118.01    | 0.379 | 0.686 <sup>b</sup> | 111.33±151.68   | 68.38±113.99    | 1.320  | 0.191 <sup>c</sup> |
| Selenium, µg                        | 26.64±23.19    | 31.58±25.24     | 38.67±21.66     | 1.288 | 0.282 <sup>b</sup> | 33.06±23.85     | 27.7±23.45      | 0.836  | 0.406 <sup>c</sup> |
| Cholesterol, mg                     | 155.93±105.31  | 166.84±177.18   | 240.19±202.19   | 1.599 | 0.209 <sup>b</sup> | 191.13±150.72   | 159.71±143.13   | 0.791  | 0.432 <sup>c</sup> |
| SFA, g                              | 3.46±4.69      | 1.92±3.8        | 2.98±5.45       | 0.725 | 0.488 <sup>b</sup> | 3.74±5.44       | 2.45±3.89       | 1.122  | 0.266 <sup>c</sup> |
| MFA, g                              | 6.13±6.93      | 3.61±8.64       | 5.86±7.38       | 0.769 | 0.468 <sup>b</sup> | 7.55±7.66       | 3.95±7.01       | 2.004  | 0.049 <sup>c</sup> |
| PFA, g                              | 2.69±3.45      | 1.63±3.93       | 2.41±3.06       | 0.589 | 0.558 <sup>b</sup> | 3.3±3.62        | 1.71±3.31       | 1.874  | 0.065 <sup>c</sup> |
| GI                                  | 395.94±269.86  | 317.44±260.22   | 479.22±326.53   | 1.282 | 0.284 <sup>b</sup> | 419.17±309.85   | 368.28±255.62   | 0.645  | 0.521 <sup>c</sup> |
| GL                                  | 96.01±69.35    | 95.38±80.42     | 108.86±90.34    | 0.149 | 0.862 <sup>b</sup> | 97.03±77.98     | 98.6±73.79      | -0.209 | 0.835 <sup>c</sup> |
| Milk, times/month                   | 21.02±9.92     | 20.63±10.09     | 17.5±11.35      | 0.567 | 0.570 <sup>b</sup> | 20.13±10.52     | 20.49±9.99      | -0.072 | 0.943 <sup>c</sup> |
| Yogurt, times/month                 | 10.93±8.74     | 7.16±4.68       | 10.17±9.24      | 1.471 | 0.237 <sup>b</sup> | 8.83±8.03       | 10.51±8.07      | -0.848 | 0.399 <sup>c</sup> |
| Chocolate, times/month              | 5.83±7.64      | 5.11±4.68       | 5.92±7.13       | 0.083 | 0.921 <sup>b</sup> | 5.27±7.41       | 5.93±6.46       | -0.489 | 0.626 <sup>c</sup> |
| Puffed cereals, times/month         | 10.05±10.79    | 14.16±12.81     | 10.25±11.25     | 0.893 | 0.414 <sup>b</sup> | 10.4±11.45      | 11.67±11.47     | -0.326 | 0.746 <sup>c</sup> |
| Cookies Maria style, times/month    | 4.07±5.82      | 6.47±10.01      | 3.17±3.76       | 1.075 | 0.347 <sup>b</sup> | 5.1±7.8         | 4.16±6.31       | 0.502  | 0.617 <sup>c</sup> |
| Choco-cream cookies, times/month    | 4.69±6.3       | 3.89±6.64       | 3.42±3.96       | 0.254 | 0.776 <sup>b</sup> | 3.6±4.89        | 4.74±6.72       | -0.869 | 0.388 <sup>c</sup> |
| Muffins, times/month                | 8.67±9.97      | 12±12.07        | 9.67±10.71      | 0.639 | 0.531 <sup>b</sup> | 9.43±10.27      | 9.88±10.96      | -0.268 | 0.789 <sup>c</sup> |
| Donuts and croissants, times/month  | 3.31±6.38      | 2.32±4.44       | 3.83±8.01       | 0.255 | 0.775 <sup>b</sup> | 4.57±8.07       | 2.14±4.23       | 1.619  | 0.110 <sup>c</sup> |
| Salad, times/month                  | 9.93±8.9       | 9.68±7.7        | 15.5±10.09      | 2.064 | 0.135 <sup>b</sup> | 7.83±7.9        | 12.84±9.13      | -2.412 | 0.018 <sup>c</sup> |
| Spinach, swiss card, times/month    | 4.64±6.34      | 3.79±6.73       | 11.58±10.35     | 5.093 | 0.009 <sup>b</sup> | 5.9±7.5         | 5.33±7.77       | 0.400  | 0.691 <sup>c</sup> |
| Vegetables on the side, times/month | 5.69±7.06      | 5.37±7.24       | 9.17±10.1       | 1.105 | 0.337 <sup>b</sup> | 6.37±7.95       | 6.05±7.56       | 0.095  | 0.924 <sup>c</sup> |
| Potatoes, times/month               | 4.4±4.89       | 5.63±4.51       | 10±8.39         | 4.818 | 0.011 <sup>b</sup> | 4.5±4.71        | 6.44±6.37       | -1.527 | 0.131 <sup>c</sup> |
| Legumes, times/month                | 9.52±8.97      | 9.89±9.18       | 7.17±7.7        | 0.404 | 0.669 <sup>b</sup> | 8.8±8.71        | 9.53±8.89       | -0.409 | 0.683 <sup>c</sup> |
| Rice, times/month                   | 11.43±9.39     | 13.26±8.95      | 10.75±9.72      | 0.343 | 0.711 <sup>b</sup> | 13.3±9.88       | 10.74±8.74      | 1.083  | 0.283 <sup>c</sup> |
| Pasta, times/month                  | 10.14±8.36     | 12.26±8.82      | 12.25±11.42     | 0.490 | 0.615 <sup>b</sup> | 11.2±9.16       | 10.93±8.92      | 0.015  | 0.988 <sup>c</sup> |
| Creamy soups, times/month           | 5.05±7.05      | 4±4.33          | 8.25±9.44       | 1.451 | 0.241 <sup>b</sup> | 6±8.37          | 4.81±5.86       | 0.693  | 0.491 <sup>c</sup> |
| Eggs, times/month                   | 8.17±7.45      | 8.84±7.57       | 8.5±5.27        | 0.059 | 0.942 <sup>b</sup> | 9.77±7.8        | 7.44±6.47       | 1.325  | 0.189 <sup>c</sup> |
| Chicken or turkey, times/month      | 11.79±7.87     | 9.47±5.69       | 17±8.38         | 3.803 | 0.027 <sup>b</sup> | 12.37±8.65      | 11.81±7.14      | 0.297  | 0.767 <sup>c</sup> |
| Beef, pig or lamb, times/month      | 7.67±5.82      | 7.95±5.99       | 6.67±5.99       | 0.186 | 0.831 <sup>b</sup> | 8.27±6.27       | 7.09±5.52       | 0.923  | 0.359 <sup>c</sup> |
| Minced meat, times/month            | 3.36±3.82      | 3.11±2.75       | 3.25±4.67       | 0.030 | 0.970 <sup>b</sup> | 2.43±2.5        | 3.86±4.25       | -1.750 | 0.085 <sup>c</sup> |
| White fish, times/month             | 1.95±3.32      | 1.21±1.99       | 2±2.41          | 0.476 | 0.623 <sup>b</sup> | 1.6±3.29        | 1.88±2.58       | -0.404 | 0.688 <sup>c</sup> |
| Blue fish, times/month              | 1.02±2.2       | 1.26±1.76       | 3.08±6.72       | 1.875 | 0.161 <sup>b</sup> | 2.33±4.84       | 0.79±1.28       | 1.949  | 0.055 <sup>c</sup> |
| Seafood, times/month                | 0.88±1.42      | 0.53±0.7        | 0.75±1.54       | 0.492 | 0.614 <sup>b</sup> | 0.8±1.4         | 0.74±1.22       | 0.199  | 0.843 <sup>c</sup> |
| Croquettes, times/month             | 2.24±3.86      | 1.16±1.46       | 2.17±2.33       | 0.790 | 0.458 <sup>b</sup> | 1.57±3.05       | 2.21±3.26       | -0.912 | 0.365 <sup>c</sup> |
| Bread, times/month                  | 5.55±7.36      | 7.05±8.23       | 9.25±9.88       | 1.043 | 0.358 <sup>b</sup> | 6.33±6.86       | 6.7±8.84        | -0.270 | 0.788 <sup>c</sup> |
| Ham, times/month                    | 8.33±7.34      | 11.58±8.1       | 9.08±8.92       | 1.137 | 0.327 <sup>b</sup> | 8.9±7.1         | 9.58±8.36       | -0.380 | 0.705 <sup>c</sup> |
| White cheese, times/month           | 8.55±8.03      | 10.79±8.16      | 13.25±10.63     | 1.560 | 0.217 <sup>b</sup> | 9.27±8.33       | 10.35±8.83      | -0.548 | 0.585 <sup>c</sup> |
| Other cheese, times/month           | 3.88±7.01      | 4.84±8.17       | 5.5±10.19       | 0.237 | 0.789 <sup>b</sup> | 4.47±7.68       | 4.35±7.98       | 0.008  | 0.994 <sup>c</sup> |
| Citric fruits, times/month          | 14.43±10.05    | 19.21±10.28     | 17.75±9.71      | 1.646 | 0.200 <sup>b</sup> | 13.6±9.6        | 18.05±10.22     | -1.766 | 0.082 <sup>c</sup> |

|                                     |            |             |            |       |                    |             |             |        |                    |
|-------------------------------------|------------|-------------|------------|-------|--------------------|-------------|-------------|--------|--------------------|
| Other fruits, times/month           | 17.74±12.5 | 21.47±8.97  | 26.67±4.62 | 3.408 | 0.039 <sup>b</sup> | 15.77±11.21 | 23.26±10.04 | -3.031 | 0.003 <sup>c</sup> |
| Canned fruit, times/month           | 0.64±1.12  | 1.84±6.41   | 0.83±1.4   | 0.826 | 0.442 <sup>b</sup> | 0.83±1.34   | 1.09±4.3    | -0.347 | 0.729 <sup>c</sup> |
| Natural fruit juice, times/month    | 8.24±9.33  | 8.68±10.73  | 9.33±9.65  | 0.062 | 0.940 <sup>b</sup> | 7.8±9.43    | 9.05±9.85   | -0.351 | 0.727 <sup>c</sup> |
| Commercial fruit juice, times/month | 4.14±6.13  | 8.42±9.48   | 1.67±3.17  | 4.119 | 0.020 <sup>b</sup> | 4.1±7.05    | 5.37±7.21   | -0.759 | 0.451 <sup>c</sup> |
| Nuts, times/month                   | 3.67±5.43  | 3.26±5.78   | 6±8.73     | 0.829 | 0.441 <sup>b</sup> | 3.47±6      | 4.28±6.28   | -0.618 | 0.539 <sup>c</sup> |
| Dairy desserts, times/month         | 2.95±4.16  | 2.89±4.93   | 5.92±9.13  | 1.513 | 0.227 <sup>b</sup> | 4±6.41      | 3.02±4.75   | 0.687  | 0.495 <sup>c</sup> |
| Cakes, times/month                  | 1.14±2.59  | 1.47±2.12   | 1.58±2.54  | 0.211 | 0.810 <sup>b</sup> | 1.2±2.67    | 1.37±2.3    | -0.347 | 0.730 <sup>c</sup> |
| Fry bags, times/month               | 5.6±7.72   | 5.37±5.85   | 2.92±4.14  | 0.742 | 0.480 <sup>b</sup> | 5.57±7.03   | 4.77±6.68   | 0.534  | 0.595 <sup>c</sup> |
| Candies, times/month                | 8.33±9.07  | 5.16±7.32   | 6.25±8.61  | 0.978 | 0.381 <sup>b</sup> | 8.57±9.79   | 6.19±7.59   | 1.089  | 0.280 <sup>c</sup> |
| Ice-cream, times/month              | 1.88±3.63  | 4.95±7.78   | 3.92±3.65  | 2.655 | 0.077 <sup>b</sup> | 3.27±4.84   | 2.84±5.41   | 0.291  | 0.772 <sup>c</sup> |
| Soda, times/month                   | 6.67±8.66  | 12.84±10.46 | 6.67±10.42 | 3.007 | 0.056 <sup>b</sup> | 7.57±9.82   | 8.77±9.7    | -0.326 | 0.746 <sup>c</sup> |
| Light soda, times/month             | 0.1±0.48   | 0.32±0.82   | 1±3.46     | 1.741 | 0.183 <sup>b</sup> | 0.57±2.24   | 0.12±0.54   | 1.247  | 0.216 <sup>c</sup> |
| Wine, times/month                   | 0.12±0.63  | 0.16±0.69   | 0.25±0.62  | 0.194 | 0.824 <sup>b</sup> | 0.3±0.95    | 0.05±0.21   | 1.663  | 0.101 <sup>c</sup> |
| Beer, times/month                   | 0.74±1.87  | 0.16±0.37   | 1.42±2.57  | 1.882 | 0.160 <sup>b</sup> | 0.87±2.1    | 0.58±1.56   | 0.627  | 0.533 <sup>c</sup> |
| Non-alcohol beer, times/month       | 0.1±0.62   | 0±0         | 0±0        | 0.363 | 0.697 <sup>b</sup> | 0.13±0.73   | 0±0         | 1.187  | 0.239 <sup>c</sup> |
| Distilled drinks, times/month       | 0.24±0.91  | 0±0         | 0.25±0.62  | 0.754 | 0.474 <sup>b</sup> | 0.23±0.82   | 0.14±0.68   | 0.510  | 0.611 <sup>c</sup> |

Data are presented as n (percentage) or mean ± standard deviation. CDMX: Mexico City; ZMVM: Metropolitan Zone of the Valley of Mexico; LMP/USG : Last Menstrual Period/Ultrasonography; DTB: Diabetes; HTN: hypertension; TB: tuberculosis; OB: obesity; MS: Metabolic syndrome; Wkends: week-ends; Occas: occasionally; NNS: non-nutritive sweeteners; HCO: Carbohydrates; BMI: Body Mass Index; Kcal: Kilocalories; SFA: Saturated Fatty Acids; MFA: Monounsaturated Fatty Acids; PFA: Polyunsaturated Fatty Acids; GI: Glycemic Index; GL: Glycemic Load; <sup>a</sup> Chi-squared test; <sup>b</sup> NOVA; <sup>c</sup> t-test.

Table S2. Alpha summary. Alpha diversity indexes for each group of frequency of NNS consumption. KW: Kruskal-Wallis; AOV: Analysis of Variance.

| <i>Alpha.diversity.index</i> | <i>Q1_mean</i> | <i>Q2_mean</i> | <i>Q3_mean</i> | <i>Q4_mean</i> | <i>test</i> | <i>statistic</i> | <i>p.value</i> |
|------------------------------|----------------|----------------|----------------|----------------|-------------|------------------|----------------|
| Observed                     | 161.14 ± 73.22 | 177.18 ± 82.05 | 209.5 ± 133.21 | 158.89 ± 82.02 | KW          | 1.81             | 0.61           |
| Shannon                      | 2.29 ± 0.71    | 2.48 ± 0.71    | 2.46 ± 0.83    | 2.39 ± 0.74    | AOV         | 0.21             | 0.89           |
| Simpson                      | 0.7 ± 0.17     | 0.76 ± 0.15    | 0.73 ± 0.2     | 0.71 ± 0.18    | KW          | 1.37             | 0.71           |
| InvSimpson                   | 4.62 ± 2.91    | 6.5 ± 5.28     | 5.49 ± 3.13    | 4.63 ± 2.42    | KW          | 1.37             | 0.71           |
| Fisher                       | 23.93 ± 10.66  | 26.48 ± 11.33  | 30.66 ± 17.93  | 25.42 ± 13.13  | KW          | 1.35             | 0.72           |

Table S3. Kingdom statistics of the comparison between the quartiles of frequency of consumption of products with NNS with Kruskal-Wallis.

|              | <i>Pr (&gt;F)</i> | <i>F</i>   | <i>FDR</i> |
|--------------|-------------------|------------|------------|
| Unassigned   | 0.40840785        | 0.97769198 | 0.40840785 |
| d__Archaea   | 0.12605738        | 1.9732129  | 0.2595336  |
| d__Bacteria  | 0.19009181        | 1.63123675 | 0.2595336  |
| d__Eukaryota | 0.1946502         | 1.61139389 | 0.2595336  |

Table S4. Phylum statistics of the comparison between the quartiles of frequency of consumption of products with NNS with Kruskal-Wallis.

|                  | <i>Pr</i> (> <i>F</i> ) | <i>F</i>   | <i>FDR</i> |
|------------------|-------------------------|------------|------------|
| Actinobacteriota | 0.29109759              | 1.27124905 | 0.51539642 |
| Bacteroidota     | 0.38654732              | 1.02606329 | 0.51539642 |
| Firmicutes       | 0.66359437              | 0.52940091 | 0.66359437 |
| Proteobacteria   | 0.29304488              | 1.26554984 | 0.51539642 |

Table S5. Genus statistics of the comparison between the quartiles of frequency of consumption of products with NNS with Kruskal-Wallis.

|                          | <i>Pr</i> (> <i>F</i> ) | <i>F</i>   | <i>FDR</i> |
|--------------------------|-------------------------|------------|------------|
| <i>Actinobacillus</i>    | 0.38303689              | 1.03405487 | 0.73067108 |
| <i>Bifidobacterium</i>   | 0.09095245              | 2.24331075 | 0.3638098  |
| <i>Blautia</i>           | 0.79680374              | 0.33951813 | 0.79680374 |
| <i>Corynebacterium</i>   | 0.07275411              | 2.42771289 | 0.3638098  |
| <i>Cutibacterium</i>     | 0.72848935              | 0.43520274 | 0.79471566 |
| <i>Gemella</i>           | 0.44266289              | 0.90625033 | 0.73067108 |
| <i>Methyloversatilis</i> | 0.17432186              | 1.70362743 | 0.52296559 |
| <i>Microbacterium</i>    | 0.49431853              | 0.80691192 | 0.73067108 |
| <i>Prevotella</i>        | 0.46679287              | 0.85870789 | 0.73067108 |
| <i>Sphingomonas</i>      | 0.00469449              | 4.72101401 | 0.05633385 |
| <i>Staphylococcus</i>    | 0.54800331              | 0.71222346 | 0.73067108 |
| <i>Streptococcus</i>     | 0.63489556              | 0.57267278 | 0.76187468 |



Table S6. Microbiome data analysis using DESeq2 to compare the quartiles of frequency of consumption of products with NNS.

| Base Mean | log2Fold Change | lfcSE | stat  | p    | padj | Kingdom      | Phylum        | Class           | Order              | Family              | Genus              | Species                    | Group comparison | NNS_Group |
|-----------|-----------------|-------|-------|------|------|--------------|---------------|-----------------|--------------------|---------------------|--------------------|----------------------------|------------------|-----------|
| 13.45     | -23.49          | 2.99  | -7.85 | 0.00 | 0.00 | d__++Archaea | Euryarchaeota | Methanobacteria | Methanobacteriales | Methanobacteriaceae | Methanobrevibacter | NA                         | Q1 vs Q2         | Q2        |
| 26.02     | 17.70           | 3.01  | 5.88  | 0.00 | 0.00 | d__Bacteria  | Firmicutes    | Bacilli         | Staphylococcales   | Staphylococcaceae   | Staphylococcus     | Staphylococcus lugdunensis | Q1 vs Q2         | Q1        |
| 16.73     | -12.60          | 1.47  | -8.55 | 0.00 | 0.00 | d__Archaea   | Euryarchaeota | Methanobacteria | Methanobacteriales | Methanobacteriaceae | Methanobrevibacter | NA                         | Q1 vs Q3         | Q3        |
| 6.97      | -8.31           | 0.99  | -8.43 | 0.00 | 0.00 | d__Bacteria  | Cyanobacteria | Cyanobacteriia  | Chloroplast        | Chloroplast         | Chloroplast        | NA                         | Q1 vs Q4         | Q4        |
| 854.79    | -0.96           | 0.24  | -4.06 | 0.00 | 0.04 | d__Bacteria  | Firmicutes    | Bacilli         | Lactobacillales    | Streptococcaceae    | Streptococcus      | NA                         | Q1 vs Q4         | Q4        |
| 4.80      | -13.46          | 2.32  | -5.80 | 0.00 | 0.00 | d__Eukaryota | Vertebrata    | Mammalia        | Mammalia           | Mammalia            | Mammalia           | Homo sapiens               | Q2 vs Q3         | Q3        |
| 1.84      | -14.14          | 2.95  | -4.80 | 0.00 | 0.00 | d__Bacteria  | Firmicutes    | Bacilli         | Staphylococcales   | Staphylococcaceae   | Staphylococcus     | Uncultured bacterium       | Q2 vs Q3         | Q3        |
| 3.47      | -13.69          | 2.94  | -4.65 | 0.00 | 0.00 | d__Eukaryota | Vertebrata    | Mammalia        | Mammalia           | Mammalia            | Mammalia           | Homo sapiens               | Q2 vs Q3         | Q3        |
| 23.23     | -11.99          | 1.47  | -8.18 | 0.00 | 0.00 | d__Bacteria  | Firmicutes    | Bacilli         | Staphylococcales   | Staphylococcaceae   | Staphylococcus     | Staphylococcus lugdunensis | Q2 vs Q4         | Q4        |
| 8.93      | -11.32          | 1.45  | -7.81 | 0.00 | 0.00 | d__Bacteria  | Firmicutes    | Bacilli         | Lactobacillales    | Streptococcaceae    | Streptococcus      | Uncultured bacterium       | Q2 vs Q4         | Q4        |
| 3.07      | -10.67          | 1.47  | -7.28 | 0.00 | 0.00 | d__Eukaryota | Vertebrata    | Mammalia        | Mammalia           | Mammalia            | Mammalia           | Homo sapiens               | Q2 vs Q4         | Q4        |
